# Supplementary material for: A computational study on second-order nonlinear optical properties based on bis-cyclometalated Ir(iii) complexes: redox and substituent effects
Source: Royal Society of Chemistry journal article supplement (doi:10.1039/d1nj01766g), 2021-01-01
Supplement: d1nj01766g5.pdf [file d1nj01766g5.pdf]

## Supporting Information

### **A Computational Study on Second-Order Nonlinear Optical Properties Based on Bis-Cyclometalated Ir(III) Complexes: Redox and Substituent Effects**

Yu Chen, Yuan Zhang, Yang Shen, Yao Yao, Yuan-Yuan Zhao\*, Yong-Qing Qiu†

*Institute of Functional Material Chemistry, Faculty of Chemistry, Northeast Normal  
University, Changchun, 130024, China*

---

\* Corresponding Author. Fax: +86043185099291  
E-mail addresses: [yuan-yuan-zhao@outlook.com](mailto:yuan-yuan-zhao@outlook.com) (Y. Y. Zhao)  
† Corresponding Author. Fax: +86043185098768.  
E-mail addresses: [qiuyq466@nenu.edu.cn](mailto:qiuyq466@nenu.edu.cn) (Y. Q. Qiu)

## General Comments

**Table S1** Selected bond lengths (Å) and bond angles (°) of all studied complexes obtained at the PBE1PBE//6-31G(d)/SDD level.

**Fig. S1** Comparison of the absorption spectra of complex **2** computed by four various functions of theory.

**Fig. S2** Molecular orbitals related to the dominant electron transitions of all studied complexes.

**Fig. S3** The  $\beta_{\text{tot}}$  values of all studied complexes by using the CAM-B3LYP and  $\omega$ B97XD functionals with 6-31+G(d) basis set.

**Table S1.** Selected bond lengths (Å) and bond angles (°) of all studied complexes obtained at the PBE1PBE//6-31G(d)/SDD level.

| Complex              | Ir-N <sub>1</sub> | Ir-C <sub>2</sub> | Ir-N <sub>3</sub> | Ir-C <sub>4</sub> | Ir-C <sub>5</sub> | Ir-C <sub>6</sub> | ∠N <sub>3</sub> -Ir-C <sub>6</sub> | ∠N <sub>1</sub> -Ir-C <sub>2</sub> |
|----------------------|-------------------|-------------------|-------------------|-------------------|-------------------|-------------------|------------------------------------|------------------------------------|
| <b>1</b>             | 2.062             | 2.059             | 2.069             | 2.087             | 2.069             | 2.107             | 95.4                               | 80.4                               |
| <b>1<sup>+</sup></b> | 2.072             | 2.005             | 2.076             | 2.064             | 2.156             | 2.118             | 95.7                               | 81.3                               |
| <b>1<sup>-</sup></b> | 2.069             | 2.060             | 2.068             | 2.089             | 2.046             | 2.107             | 96.3                               | 80.2                               |
| <b>2<sup>a</sup></b> | 2.059             | 2.059             | 2.061             | 2.073             | 2.054             | 2.086             | 97.3                               | 80.1                               |
| <b>2</b>             | 2.065             | 2.060             | 2.071             | 2.083             | 2.066             | 2.105             | 96.0                               | 80.4                               |
| <b>2<sup>+</sup></b> | 2.075             | 2.005             | 2.077             | 2.057             | 2.143             | 2.124             | 95.9                               | 81.3                               |
| <b>2<sup>-</sup></b> | 2.068             | 2.060             | 2.066             | 2.087             | 2.052             | 2.110             | 95.0                               | 80.1                               |
| <b>3</b>             | 2.063             | 2.058             | 2.070             | 2.087             | 2.071             | 2.107             | 95.0                               | 80.3                               |
| <b>3<sup>+</sup></b> | 2.072             | 2.062             | 2.077             | 2.082             | 2.057             | 2.084             | 97.2                               | 80.4                               |
| <b>3<sup>-</sup></b> | 2.069             | 2.059             | 2.068             | 2.088             | 2.049             | 2.107             | 96.0                               | 80.1                               |
| <b>4</b>             | 2.064             | 2.059             | 2.070             | 2.087             | 2.061             | 2.107             | 95.7                               | 80.3                               |
| <b>4<sup>+</sup></b> | 2.075             | 2.004             | 2.076             | 2.064             | 2.151             | 2.120             | 95.7                               | 81.3                               |
| <b>4<sup>-</sup></b> | 2.063             | 2.058             | 2.060             | 2.088             | 2.075             | 2.107             | 94.7                               | 80.2                               |
| <b>5</b>             | 2.062             | 2.057             | 2.068             | 2.086             | 2.073             | 2.107             | 95.3                               | 80.3                               |
| <b>5<sup>+</sup></b> | 2.073             | 2.008             | 2.073             | 2.064             | 2.156             | 2.119             | 95.8                               | 81.3                               |
| <b>5<sup>-</sup></b> | 2.069             | 2.058             | 2.068             | 2.087             | 2.049             | 2.107             | 96.4                               | 80.1                               |

<sup>a</sup> Experimental values from X-ray data in ref [54]

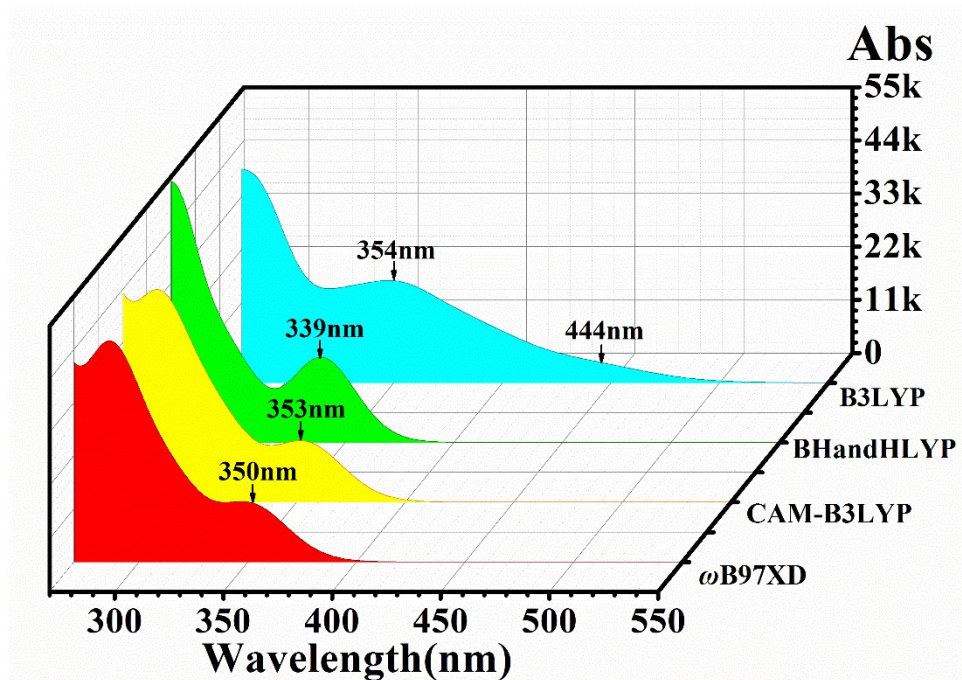

**Fig. S1** Comparison of the absorption spectra of complex **1** computed by four various functions of theory.

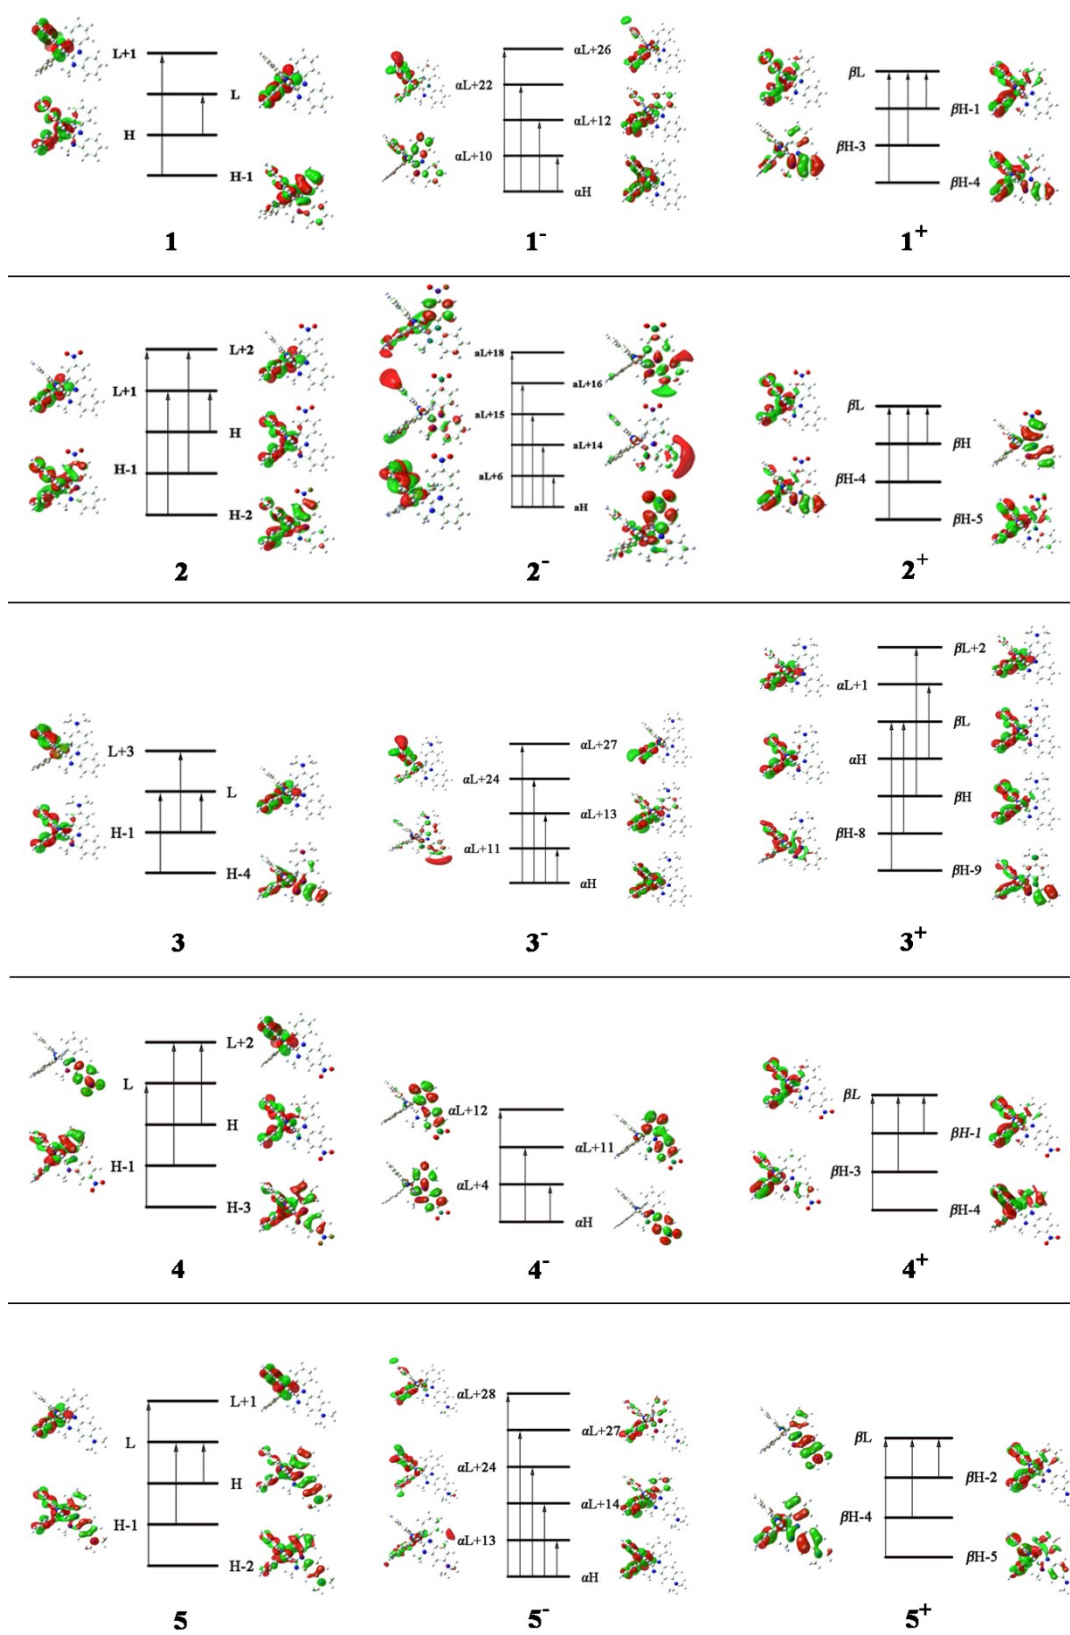

Fig. S2 Molecular orbitals related to the main excited states for all studied complexes.

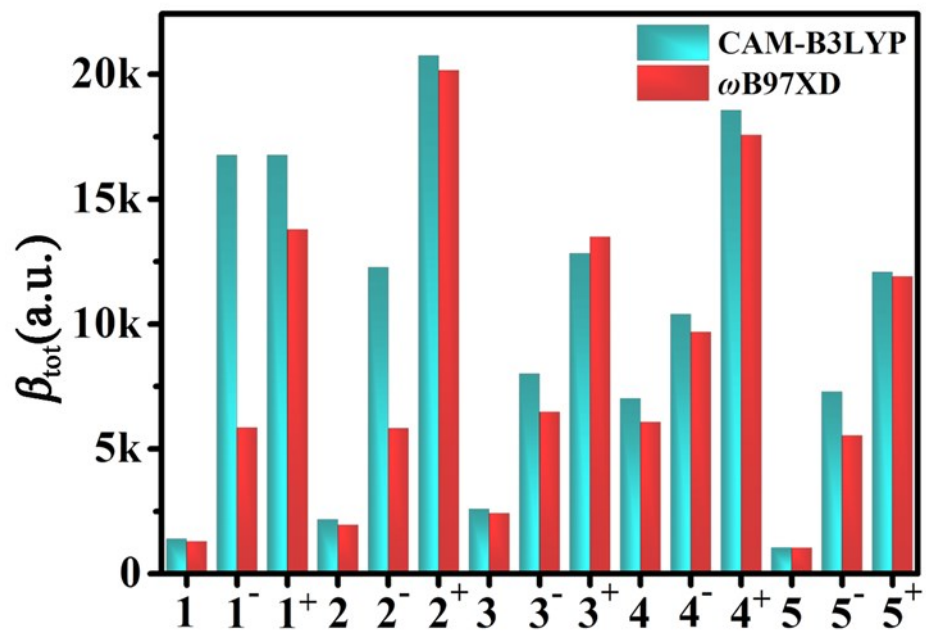

**Fig. S3** The  $\beta_{\text{tot}}$  values of all studied complexes by using the CAM-B3LYP and  $\omega$ B97XD functionals with 6-31+G(d) basis set.
