# Supplementary figures and images for: A computational study on second-order nonlinear optical properties based on bis-cyclometalated Ir(iii) complexes: redox and substituent effects
Source: Royal Society of Chemistry journal article supplement (doi:10.1039/d1nj01766g), 2021-01-01

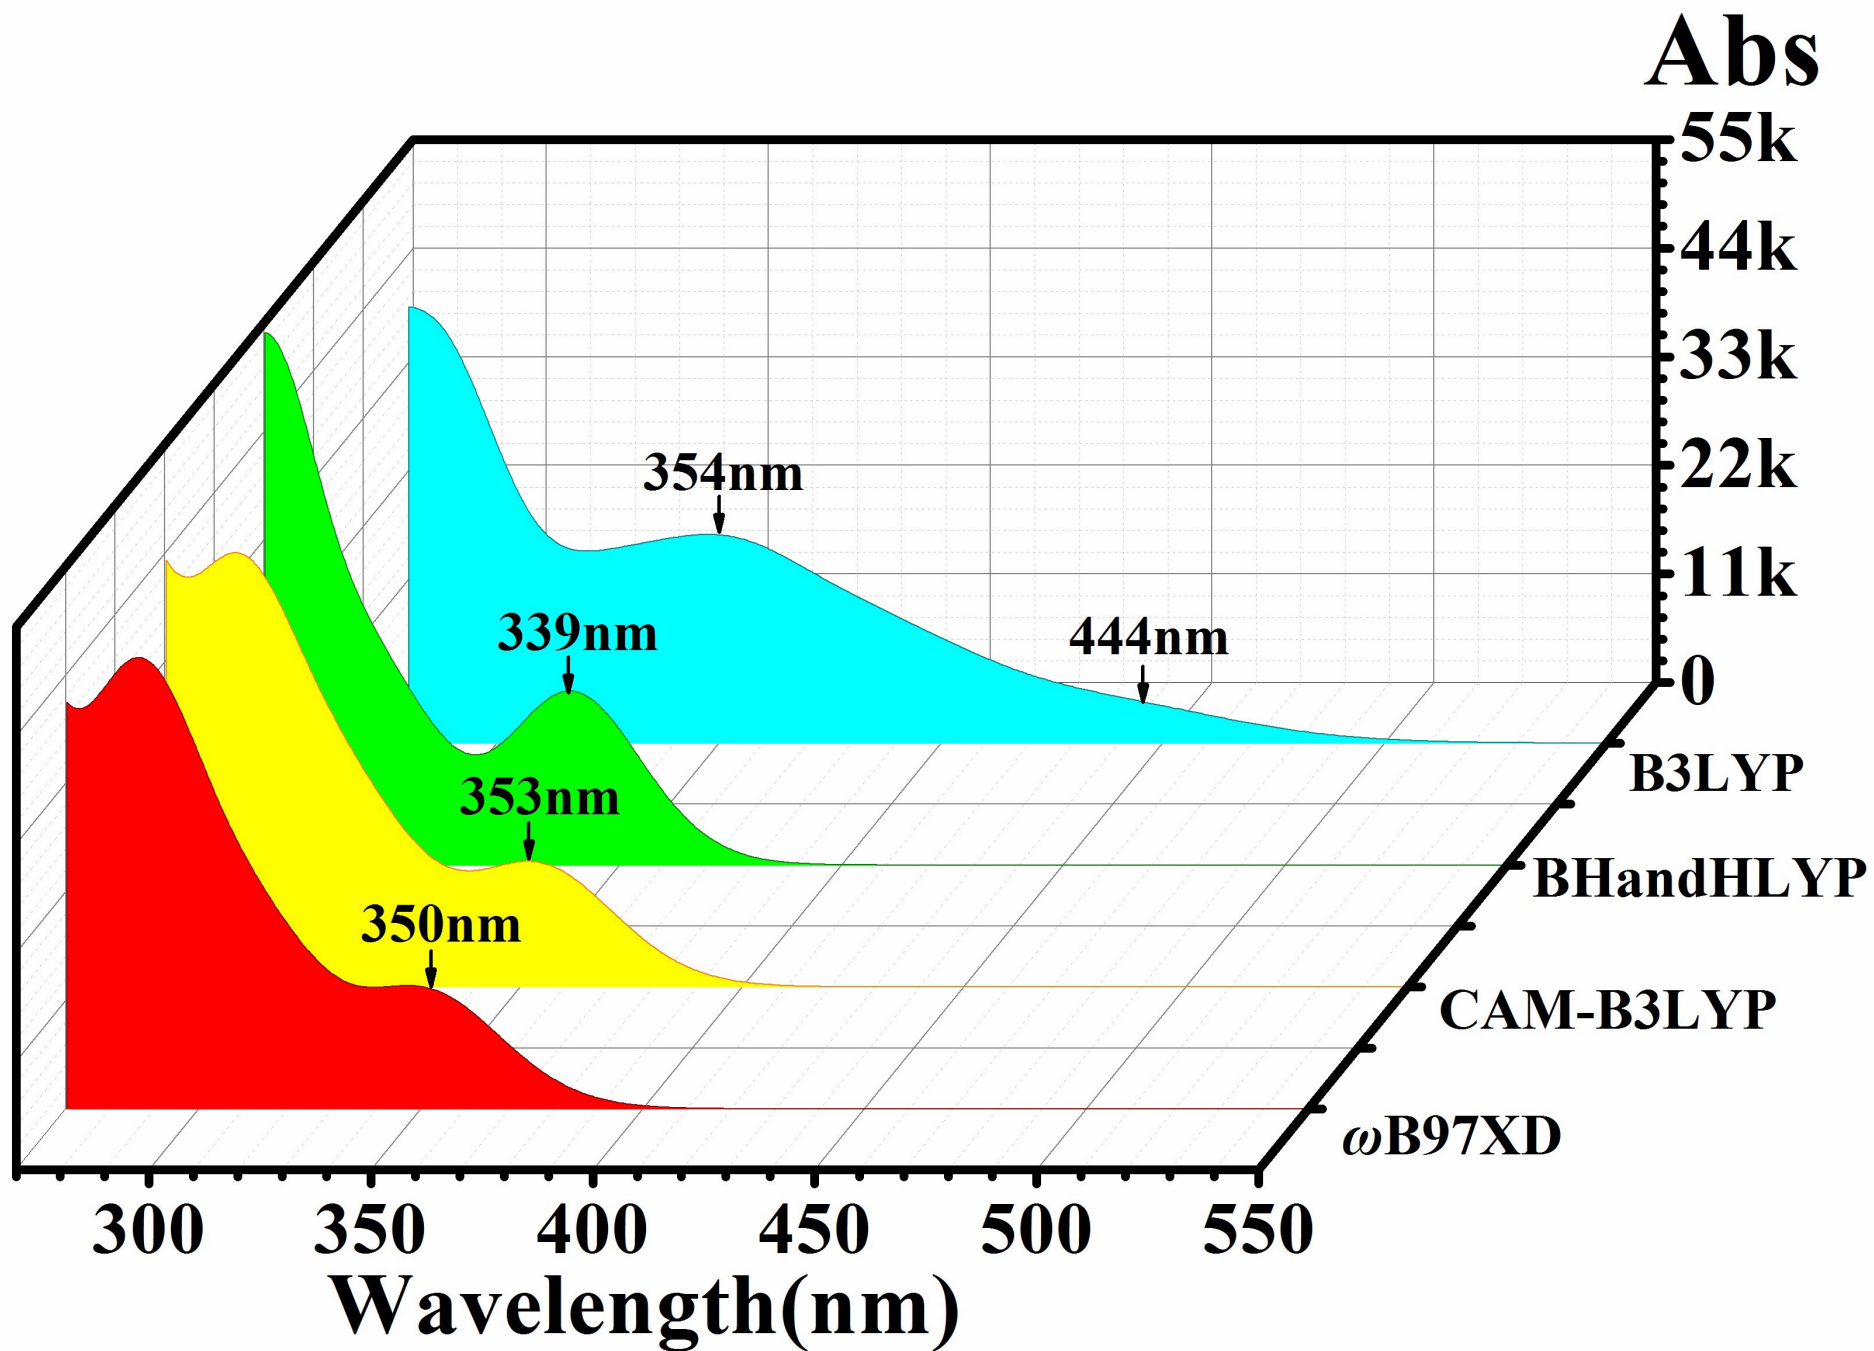

Supplement: d1nj01766g2.pdf [file d1nj01766g2.pdf]

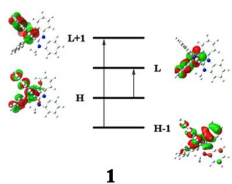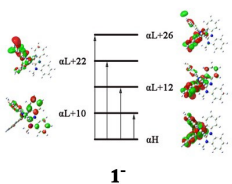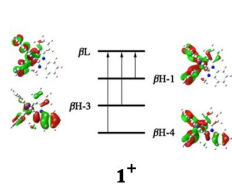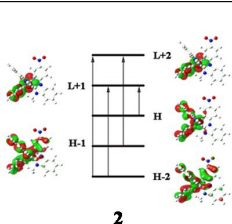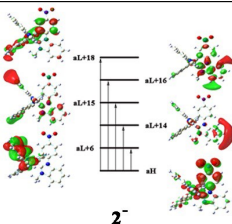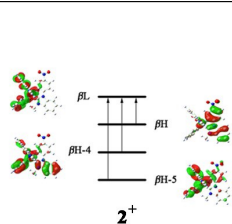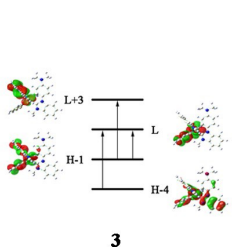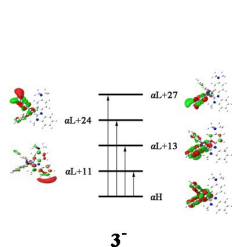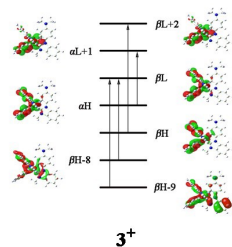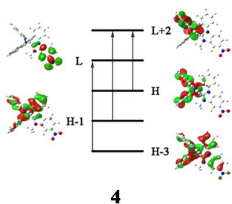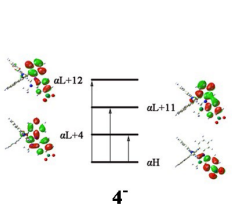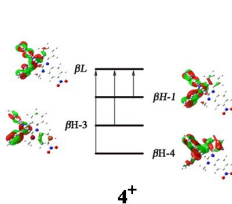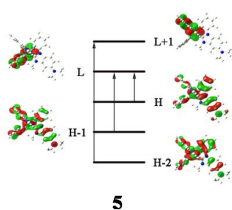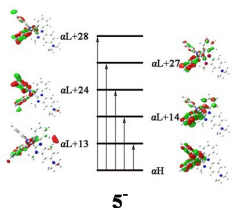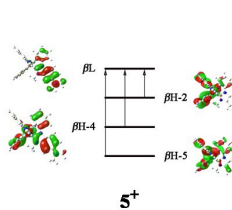

Supplement: d1nj01766g3.pdf [file d1nj01766g3.pdf]

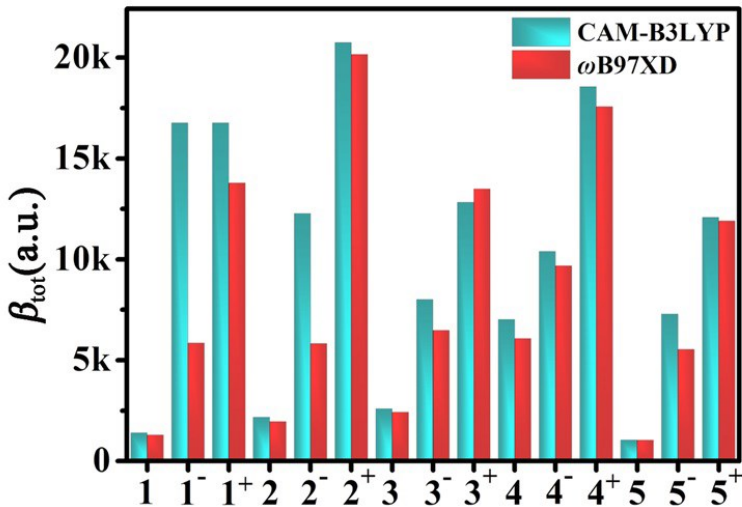

Supplement: d1nj01766g4.pdf [file d1nj01766g4.pdf]
